# Supplementary material for: Routine angiography in survivors of out of hospital cardiac arrest with return of spontaneous circulation: a single site registry
Source: PubMed Central journal article supplement (PMC3944915; doi:10.1186/1471-2261-14-30), 2014-03-03
Supplement: 1471-2261-14-30-S2.pdf [file 1471-2261-14-30-S2.pdf]

## SUPPLEMENT 2

### Multivariate analysis

| Good Outcome                   | OR   | SE   | z     | P>z   | 95% CI       |
|--------------------------------|------|------|-------|-------|--------------|
| Age                            | 0.95 | 0.02 | -2.84 | 0.004 | 0.91 - 0.98  |
| Cardiogenic shock              | 0.34 | 0.19 | -1.97 | 0.049 | 0.12 - 0.99  |
| Transfer from another hospital | 3.26 | 1.79 | 2.15  | 0.032 | 1.11 - 9.57  |
| Cooling                        | 0.26 | 0.16 | -2.12 | 0.034 | 0.07 - 0.90  |
| Constant                       | 2.92 | 1.94 | 1.61  | 0.107 | 0.79 - 10.72 |

| Good Outcome                             | OR   | Suff | 2*Pr(Suff.) | 95% CI      |
|------------------------------------------|------|------|-------------|-------------|
| Intubated                                | 1    |      |             |             |
| GCS <=8                                  | 0.80 | 11   | 0.86        | 0.26 - 2.48 |
| <i>* median unbiased estimates (MUE)</i> |      |      |             |             |

OR = odds ratio

SE = standard error

CI = confidence interval
